# Supplementary material
Source: publisher figshare collection journal article supplement (https://tandf.figshare.com/articles/dataset/_/5500696)
Supplement: Supplementary file 1 [file 1]

**Trends in the proportion of married women of reproductive age in Spain, 1887-1991**

**APPENDIX**

Note: We suggest that to avoid making the article excessively lengthy, this appendix should be published online as supplementary material.

**Sources consulted:**

**.- Princeton nuptiality index (*I*m):** The provincial values for the Princeton nuptiality index were obtained from Coale and Watkins (1986). Data available from the following University of Princeton website: <https://opr.princeton.edu/archive/pefp/demog.aspx>. The author of the present paper calculated the indices for 1950, 1970, 1981, 1991 and 2001. From 1565 to 1845 for Spain, Moreno-Almárcegui and Sánchez-Barricarte (2015).

.- **Life expectation at birth** **(e0) (both sexes):** 1866, Dopico (1987); from 1900 to 1930, Dopico and Reher (1998); 1940 and 1950, calculated by the present author; from 1960 to 2001, Blanes (2007).

**.- Gross domestic product per capita (GDPpc):** gross domestic product at factor cost per capita in constant 1995 pesetas (old Spanish currency). From 1860 to 1920, Rosés, Martínez-Galarraga and Tirado (2010) and Díez-Minguela, Martínez-Galarraga and Tirado (2015); from 1930 to 2000, Alcaide-Inchausti (2003).

**.- Percentage of urban population (Urbpop):** people living in towns with 10,000 or more inhabitants. From 1900 to 1990, Mas Ivars et al. (2006).

**.- Percentage of illiterate people (Illit):** percentage of illiterate population (unable to read or write) aged over 10 years. Author’s calculations based on Spanish census data.

**.- Total employment rate (TER):** percentage of the total labor force that is employed. From 1900 to 2000, Alcaide-Inchausti (2007).

**.- Female employment rate (FER):** percentage of the female labor force that is employed. From 1900 to 2000, Alcaide-Inchausti (2007).

**.- Employment rate in the secondary and tertiary sector (ER2-3):** Rate of employment in the secondary and tertiary sector per 1000 people aged 16 to 64 years. Calculated by dividing the number of employees in the secondary and tertiary sector by the number of people aged 16 to 64. From 1930 to 1990, Alcaide-Inchausti (2003).

.- **Female sex ratio (FSR15-49):** number of women aged 15-49 years divided by the number of men in the same age group. From 1900 to 2001, author’s calculations based on Spanish census data.

**Table A1. Variance inflation factor (VIF) for different independent variables.**

Source: see appendix.

**Table A2. Fixed effects and time effects panel corrected standard errors (*I*m, dependent variable), Spanish provinces.**

**A) Period 1887-1940**

**B) Period 1941-1990**

Standard errors in italics

Signif. codes: p-value <0.01 ‘***’ <0.05 ‘**’ <0.1 ‘*’

Source: see appendix.

**Graph A1. Scatter plot and predicted values of *I*m and GDPpc (Spanish provinces, 1887-1990).**

**Graph A2. Scatter plot and predicted values of *I*m and percentage of urban population (Spanish provinces, 1900-1990).**

**Bibliography for Appendix:**

Alcaide-Inchausti, J. (2003), *Evolución económica de las regiones y provincias españolas en el siglo XX*, Bilbao: Fundación BBVA.

Alcaide-Inchausti, J. (2007), *Evolución de la población española en el siglo XX por provincias y comunidades autónomas*, Bilbao: Fundación BBVA.

Blanes, A. 2007. La mortalidad en la España del siglo XX. Análisis demográfico y territorial [Child mortality in Spain in the 20th century. Demographic and territorial analysis], Ph. D. Thesis, Departamento de Geografía, Universidad Autónoma de Barcelona.

Cachinero-Sánchez, B. (1982), “La evolución de la nupcialidad en España (1887-1975), *Revista Española de Investigaciones Sociológicas*, 20: 81-99.

Coale, A. and S. Watkins (eds.). 1986. *The decline of fertility in Europe*. Princeton: Princeton University Press, Data available in the Web: <http://opr.princeton.edu/archive/pefp/>

Díez-Minguela, A.; Martínez-Galarraga, J. and Tirado-Fabregat, D. (2015), “Why did Spanish regions not converge before the Civil War? Agglomeration economies and (regional) growth revisited”, *Revista de Historia Económica*, DOI: 10.1017/S0212610915000300.

Dopico, F. 1987. Regional mortality tables for Spain in the 1860s, *Historical Methods* 20(4): 173-179.

Dopico, F. and D. Reher. 1998. *El declive de la mortalidad en España, 1860-1930 [The decline of mortality in Spain, 1860-1930].* Huesca: Asociación de Demografía Histórica, monografía. Data available in the Web: <http://geps.es/bases-de-datos/> (Access on July 31st, 2017).

Mas Ivars, M.; Goerlich Gisbert, F.; Azagra Ros, J. and Chorén Rodríguez, P. (2006), *La localización de la población española sobre el territorio. Un siglo de cambios. Un estudio basado en series homogéneas (1900-2001)*, Bilbao: Fundación BBVA.

Moreno-Almárcegui, A. y Sánchez-Barricarte, J. J. (2015), “Demographic causes of urban decline in 17th Century Spain”, *Annales de Démographie Historique*, 2: 133-159.

Rosés, J.; Martínez-Galarraga, J. and Tirado-Fabregat, D. (2010), “The upswing of regional income inequality in Spain, 1860-1930”, *Explorations in Economic History*, 47(2): 244-257.
